# Supplementary material for: Low-cost green synthesis of zinc sponge for rechargeable, sustainable batteries
Source: Royal Society of Chemistry journal article supplement (doi:10.1039/d0se00562b), 2020-01-01
Supplement: d0se00562b1.pdf [file d0se00562b1.pdf]

Electronic supplementary information

## Low-cost green synthesis of zinc sponge for rechargeable, sustainable batteries

Brandon J. Hopkins,<sup>\*a</sup> Christopher N. Chervin,<sup>b</sup> Megan B. Sassin,<sup>b</sup> Jeffrey W. Long,<sup>b</sup> Debra R. Rolison,<sup>\*b</sup> and Joseph F. Parker<sup>b</sup>

<sup>a</sup> Naval Research Laboratory–National Research Council Postdoctoral Associate

Email: brandon.hopkins.ctr@nrl.navy.mil

<sup>b</sup> Surface Chemistry Branch, U. S. Naval Research Laboratory, Code 6170, Washington, DC 20375, USA

Email: debra.rolison@nrl.navy.mil

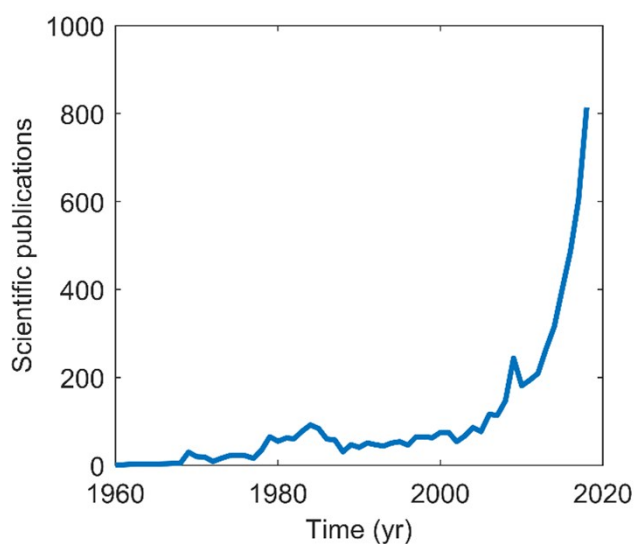

**ESI Fig. 1** Growing interest in Zn batteries. Scientific publication count versus time. The data derive from Scopus, Elsevier's citation database, using the search term "zinc batteries."

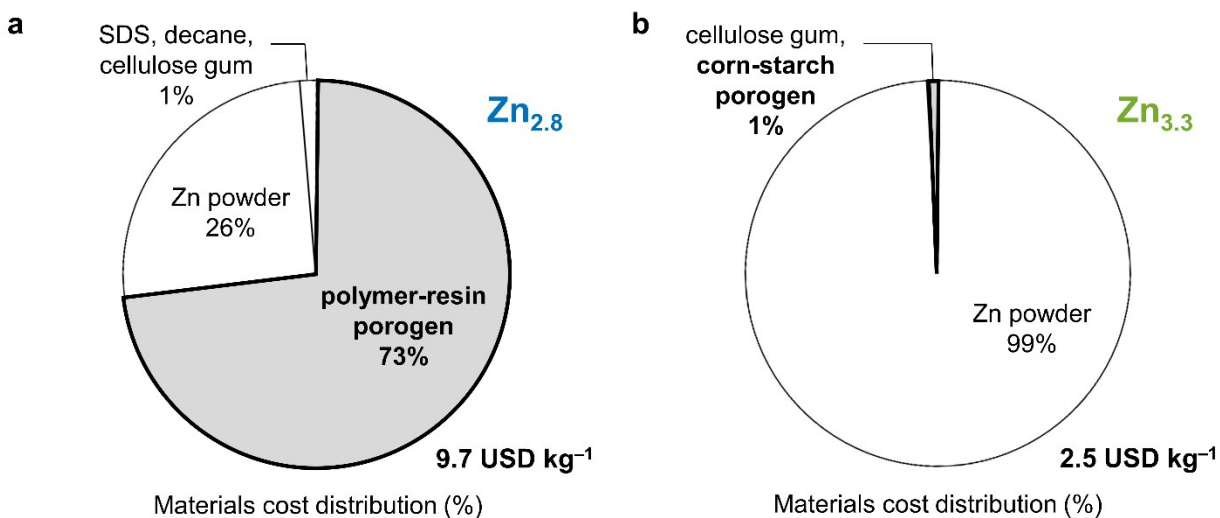

**ESI Fig. 2** Materials cost distribution of  $Zn_{2.8}$  and  $Zn_{3.3}$  sponges. (a) Materials cost distribution of  $Zn_{2.8}$ . (b) Materials cost distribution of  $Zn_{3.3}$ . The sponges use the following ingredients: decane (2 USD kg<sup>-1</sup>), polymer-resin porogen (CMC resin: 420 USD kg<sup>-1</sup>), Zn (2.5 USD kg<sup>-1</sup>), cellulose gum (1 USD kg<sup>-1</sup>), sodium dodecyl sulfate or SDS (1.5 USD kg<sup>-1</sup>), and corn starch (0.3 USD kg<sup>-1</sup>).

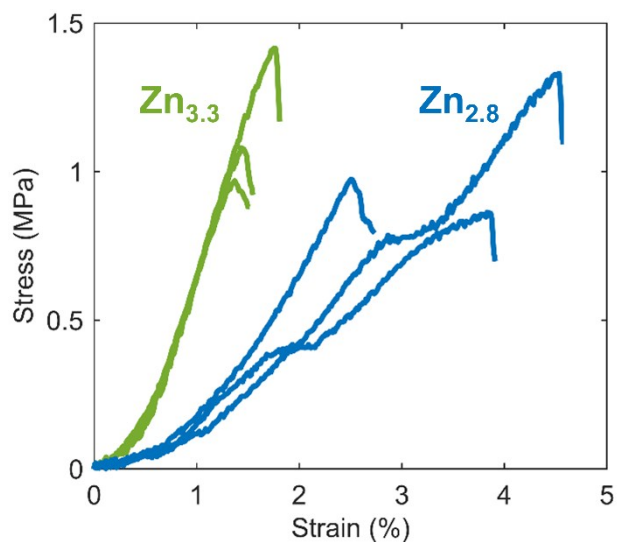

**ESI Fig. 3** Tensile stress versus strain of  $Zn_{2.8}$  and  $Zn_{3.3}$  sponges. We measured tensile stress using diametral compression testing at a constant displacement rate of 1 mm min<sup>-1</sup>. The diameter of the cylindrical samples were 11.5 mm with thickness of 4 mm. The  $Zn_{2.8}$  and  $Zn_{3.3}$  sponges yielded maximum tensile strengths of  $1.1 \pm 0.2$  MPa and  $1.2 \pm 0.2$  MPa, respectively. We calculated standard deviations based on the three trials shown for each sponge.

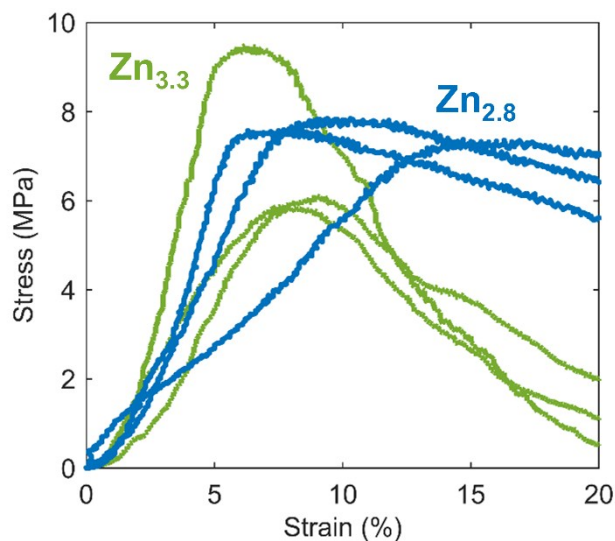

**ESI Fig. 4** Compressive stress versus strain of Zn<sub>2.8</sub> and Zn<sub>3.3</sub> sponges. We measured compressive stress using uniaxial compression testing at a constant displacement rate of 1 mm min<sup>-1</sup>. The diameter of the cylindrical samples were 11.5 mm with thickness of 4 mm. The Zn<sub>2.8</sub> and Zn<sub>3.3</sub> sponges yielded maximum tensile strengths of 7.6 ± 0.2 MPa and 7.1 ± 2.0 MPa, respectively. We calculated standard deviations based on the three trials shown for each sponge.

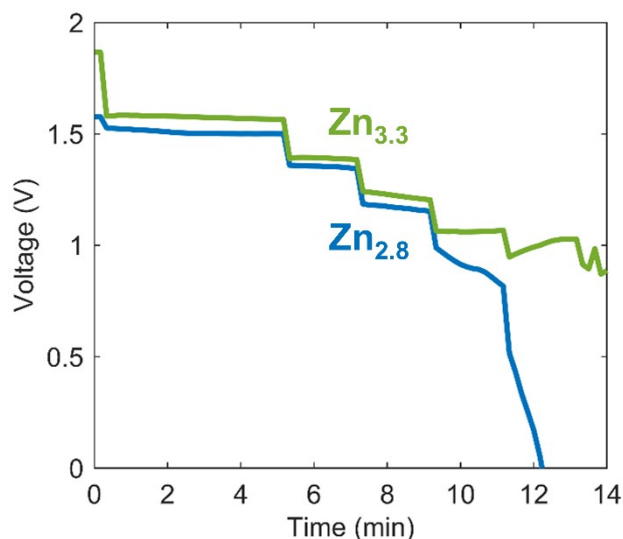

**ESI Fig. 5** Voltage versus time of Zn<sub>3.3</sub> and Zn<sub>2.8</sub> electrodes in Ag-Zn cells. Both cells were discharged at 10 mA cm<sub>geo</sub><sup>-2</sup> for 5 min as a break-in procedure. Thereafter they were discharged at 50, 100, 150, 200, and 250 mA cm<sub>geo</sub><sup>-2</sup> for 2 min. The Zn<sub>2.8</sub> and Zn<sub>3.3</sub> sponges reach peak powers of 134 ± 8 mW cm<sub>geo</sub><sup>-2</sup> and 199 ± 6 mW cm<sub>geo</sub><sup>-2</sup>, respectively. Standard deviations were calculated based on the data collected for each time interval at a given current density.

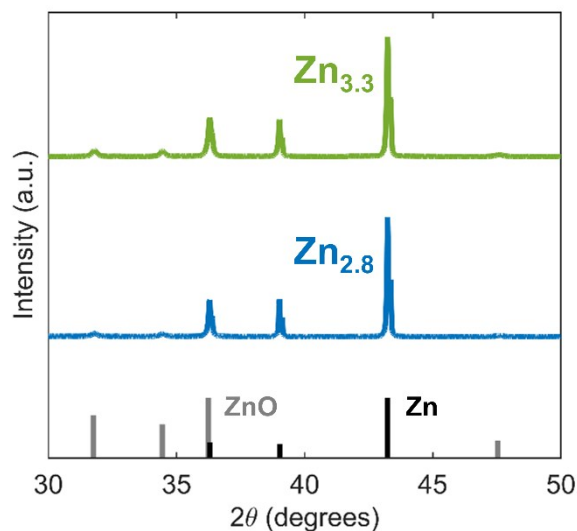

**ESI Fig. 6** X-ray powder diffraction of  $Zn_{2.8}$  and  $Zn_{3.3}$ . Based on relative intensities measured from ground-up Zn sponges indexed to Zn (ICDD #01-078-9363) and ZnO (ICDD #00-005-0664), the Zn content was 72 and 78% for  $Zn_{2.8}$  and  $Zn_{3.3}$ , respectively, with ZnO as the remaining percentage.

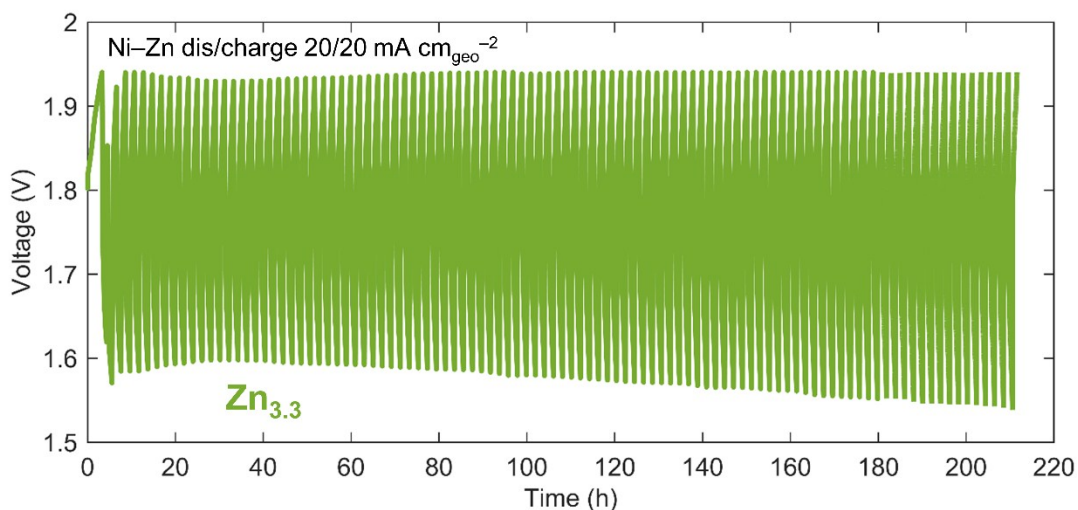

**ESI Fig. 7** Voltage versus time of  $Zn_{3.3}$  electrode cycled at 20 mA  $cm_{geo}^{-2}$  over 100 times in a Ni-Zn cell. The initial, irregular voltage profiles were due to a potentiostat programming error that was corrected for the remaining cycles. The cutoff voltages were 1.3 to 1.94 V. A coulombic efficiency of 99 to 100% was maintained with a rechargeable capacity of 20.5 mA h, corresponding to 10%  $DOD_{Zn}$ .

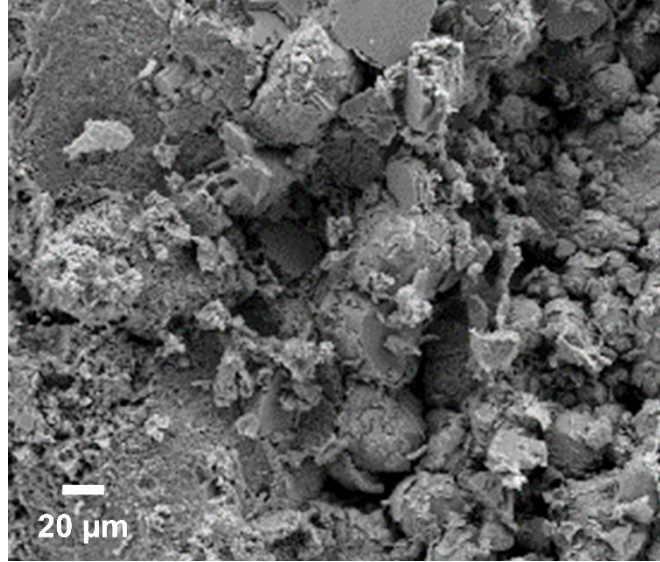

**ESI Fig. 8** Microscopic analysis of post-cycled cross-sectioned  $Zn_{3.3}$  from a Ni-Zn cell cycled at  $20 \text{ mA cm}_{\text{geo}}^{-2}$  over 100 times. Scanning electron micrograph of  $Zn_{3.3}$  after cycling protocol shown in ESI Fig 7.

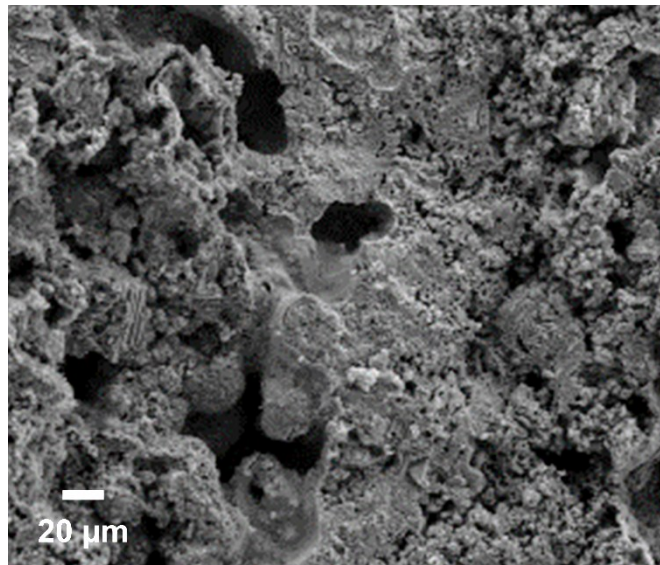

**ESI Fig. 9** Microscopic analysis of post-cycled cross-sectioned  $Zn_{3.3}$  from a Zn-air cell. Scanning electron micrograph of  $Zn_{3.3}$  after cycling as shown in Fig. 4c.

**ESI Table 1** European Union supply risk and the weight percentage of battery-relevant elements in the Earth's upper continental crust. Elements listed in bold are abundant and low risk.

| <b>Element</b>        | <b>Abundance (wt%)</b> | <b>Supply risk</b> |
|-----------------------|------------------------|--------------------|
| Iridium (Ir)          | 0.0000000022           | 2.5                |
| Ruthenium (Ru)        | 0.000000034            | 2.5                |
| Platinum (Pt)         | 0.00000005             | 2.5                |
| Palladium (Pd)        | 0.000000052            | 2.5                |
| Tellurium (Te)        | 0.0000001              | 0.8                |
| Gold (Au)             | 0.00000015             | 0.2                |
| Silver (Ag)           | 0.0000053              | 0.6                |
| Indium (In)           | 0.0000056              | 2.4                |
| Selenium (Se)         | 0.000009               | 0.4                |
| Bismuth (Bi)          | 0.000016               | 3.8                |
| Antimony (Sb)         | 0.00004                | 4.4                |
| Tantalum (Ta)         | 0.00009                | 1.1                |
| Molybdenum (Mo)       | 0.00011                | 0.9                |
| Germanium (Ge)        | 0.00014                | 1.8                |
| Tungsten (W)          | 0.00019                | 1.8                |
| Tin (Sn)              | 0.00021                | 0.8                |
| Beryllium (Be)        | 0.00021                | 2.5                |
| Gadolinium (Gd)       | 0.0004                 | 4.9                |
| Samarium (Sm)         | 0.00047                | 5.0                |
| Praseodymium (Pr)     | 0.00071                | 5.0                |
| Niobium (Nb)          | 0.0012                 | 3.2                |
| Scandium (Sc)         | 0.0014                 | 2.9                |
| Lead (Pb)             | 0.0017                 | 0.1                |
| Cobalt (Co)           | 0.0017                 | 1.5                |
| Gallium (Ga)          | 0.0018                 | 1.5                |
| Lithium (Li)          | 0.0021                 | 1.1                |
| Yttrium (Y)           | 0.0021                 | 4.9                |
| Lanthanum (La)        | 0.0031                 | 5.0                |
| Cerium (Ce)           | 0.0063                 | 5.0                |
| Vanadium (V)          | 0.0097                 | 1.5                |
| Phosphorus (P)        | 0.066                  | 4.1                |
| Magnesium (Mg)        | 1.50                   | 4.0                |
| Silicon (Si)          | 31.14                  | 1.1                |
| <b>Copper (Cu)</b>    | <b>0.0028</b>          | <b>0.2</b>         |
| <b>Nickel (Ni)</b>    | <b>0.0047</b>          | <b>0.4</b>         |
| <b>Zinc (Zn)</b>      | <b>0.0067</b>          | <b>0.4</b>         |
| <b>Chromium (Cr)</b>  | <b>0.0092</b>          | <b>0.9</b>         |
| <b>Sulfur (S)</b>     | <b>0.062</b>           | <b>0.7</b>         |
| <b>Manganese (Mn)</b> | <b>0.077</b>           | <b>0.9</b>         |
| <b>Titanium (Ti)</b>  | <b>0.38</b>            | <b>0.3</b>         |
| <b>Iron (Fe)</b>      | <b>3.92</b>            | <b>0.8</b>         |
| <b>Aluminum (Al)</b>  | <b>9.67</b>            | <b>0.5</b>         |

**ESI Table 2** System cost and specific energy of batteries that rely on abundant, low-risk elements as defined by Fig. 1a. Batteries listed in bold are based on Zn. References are found in the main text.

| System                    | Cost (USD kWh <sub>sys</sub> <sup>-1</sup> ) | Specific Energy (W h kg <sup>-1</sup> ) | Reference <sup>†</sup> |
|---------------------------|----------------------------------------------|-----------------------------------------|------------------------|
| Ni-Fe                     | 70                                           | 40                                      | 11, 11                 |
| <b>Zn-MnO<sub>2</sub></b> | <b>90</b>                                    | <b>75</b>                               | <b>12, 13</b>          |
| Fe-air                    | 100                                          | 60                                      | 14, 14                 |
| <b>Zn-air</b>             | <b>100</b>                                   | <b>400</b>                              | <b>15, 16</b>          |
| Li-ion                    | 200                                          | 120                                     | 17, 18                 |
| Na-ion                    | 280                                          | 100                                     | 19, 19                 |
| Na-S                      | 380                                          | 200                                     | 20, 20                 |
| Pb-acid                   | 490                                          | 40                                      | 20, 20                 |
| Ni-MH                     | 1000                                         | 90                                      | 21, 21                 |
| Na-NiCl <sub>2</sub>      | 1200                                         | 120                                     | 20, 20                 |

<sup>†</sup> left reference number: cost; right reference number: specific energy

**ESI Table 3** Survey of rechargeable areal capacity versus cycle life of Zn-air cells. We exclude literature values obtained using air-breathing electrodes containing scarce, high-risk elements, as defined by Fig. 1a. References are found in the main text.

| Year        | Cycle Life | Capacity (mA h cm <sub>geo</sub> <sup>-2</sup> ) | Reference        |
|-------------|------------|--------------------------------------------------|------------------|
| 2016        | 15         | 20.0                                             | 38               |
| 2015        | 15         | 30.0                                             | 39               |
| <b>2020</b> | <b>16</b>  | <b>33.4</b>                                      | <b>This work</b> |
| 2018        | 24         | 2.08                                             | 40               |
| 2015        | 25         | 0.83                                             | 41               |
| 2017        | 32         | 10.0                                             | 42               |
| 2016        | 36         | 0.17                                             | 43               |
| 2016        | 100        | 0.83                                             | 44               |
| 2017        | 102        | 1.67                                             | 45               |
| 2020        | 120        | 0.21                                             | 46               |
| 2018        | 150        | 1.25                                             | 47               |
| 2015        | 160        | 1.00                                             | 48               |
| 2017        | 175        | 0.12                                             | 49               |
| 2017        | 180        | 0.83                                             | 50               |
| 2018        | 220        | 0.45                                             | 51               |
| 2016        | 270        | 4.00                                             | 52               |
| 2017        | 300        | 0.92                                             | 53               |
| 2019        | 600        | 0.46                                             | 54               |
| 2019        | 1000       | 0.84                                             | 55               |
| 2019        | 1000       | 1.67                                             | 56               |
| 2020        | 1100       | 1.67                                             | 57               |
| 2019        | 3600       | 2.08                                             | 58               |
